# Supplementary material for: Integrative glycoproteomics reveals protein N-glycosylation aberrations and glycoproteomic network alterations in Alzheimer’s disease
Source: PubMed Central journal article supplement — Sci Adv. 2020 Oct 2;6(40):eabc5802. doi: 10.1126/sciadv.abc5802 (PMC7852392; doi:10.1126/sciadv.abc5802), 2020-10-02
Supplement: abc5802_SM.pdf [file abc5802_SM.pdf]

## Supplementary Materials for

### **Integrative glycoproteomics reveals protein N-glycosylation aberrations and glycoproteomic network alterations in Alzheimer's disease**

Qi Zhang, Cheng Ma, Lih-Shen Chin\*, Lian Li\*

\*Corresponding author. Email: [lli5@emory.edu](mailto:lli5@emory.edu) (L.L.); [lchin@emory.edu](mailto:lchin@emory.edu) (L.-S.C.)

Published 2 October 2020, *Sci. Adv.* **6**, eabc5802 (2020)  
DOI: 10.1126/sciadv.abc5802

#### **The PDF file includes:**

Table S1  
Figs. S1 to S3

#### **Other Supplementary Material for this manuscript includes the following:**

(available at [advances.sciencemag.org/cgi/content/full/6/40/eabc5802/DC1](https://advances.sciencemag.org/cgi/content/full/6/40/eabc5802/DC1))

Tables S2 to S7

## SUPPLEMENTARY TABLES

**Table S1. Demographics and phenotypic traits of human AD and control cases**

| Case                | Sex    | Age at death (yr) | Age at onset (yr) | Disease duration (yr) | PMI (hr)    | Braak stage | CERAD score | ApoE genotype |
|---------------------|--------|-------------------|-------------------|-----------------------|-------------|-------------|-------------|---------------|
| Control             |        |                   |                   |                       |             |             |             |               |
| CT1                 | Male   | 65                |                   |                       | 6           | 0           | Sparse      | E3/3          |
| CT2                 | Female | 75                |                   |                       | 6           | I           | None        | E3/3          |
| CT3                 | Male   | 61                |                   |                       | <12         | II          | None        | E3/4          |
| CT4                 | Female | 74                |                   |                       | 7           | II          | None        | E3/3          |
| CT5                 | Male   | 59                |                   |                       | 6           | I           | None        | E2/3          |
| CT6                 | Female | 78                |                   |                       | 11.5        | II          | None        | E3/3          |
| CT7                 | Male   | 94                |                   |                       | 5.5         | II          | None        | E3/3          |
| CT8                 | Female | 61                |                   |                       | 6           | II          | None        | n.d.          |
| Mean ± SEM          |        | 70.88 ± 4.19      |                   |                       | 7.5 ± 0.94  |             |             |               |
| Alzheimer's disease |        |                   |                   |                       |             |             |             |               |
| AD1                 | Male   | 79                | 73                | 6                     | 6           | V-VI        | Frequent    | E4/4          |
| AD2                 | Female | 72                | 59                | 13                    | 7           | VI          | Frequent    | E3/4          |
| AD3                 | Male   | 67                | 56                | 11                    | 6.5         | VI          | Frequent    | E2/3          |
| AD4                 | Male   | 77                | 70                | 7                     | 12          | VI          | Frequent    | E3/4          |
| AD5                 | Male   | 74                | 60                | 14                    | 2.5         | VI          | Frequent    | E3/3          |
| AD6                 | Male   | 68                | 60                | 8                     | 14.5        | VI          | Frequent    | E3/3          |
| AD7                 | Female | 61                | 51                | 10                    | 6           | VI          | Frequent    | E3/3          |
| AD8                 | Male   | 69                | 59                | 10                    | 3.5         | VI          | Frequent    | E3/4          |
| Mean ± SEM          |        | 70.88 ± 2.07      | 61 ± 2.54         | 9.88 ± 0.99           | 7.25 ± 1.44 |             |             |               |

SUPPLEMENTARY FIGURES

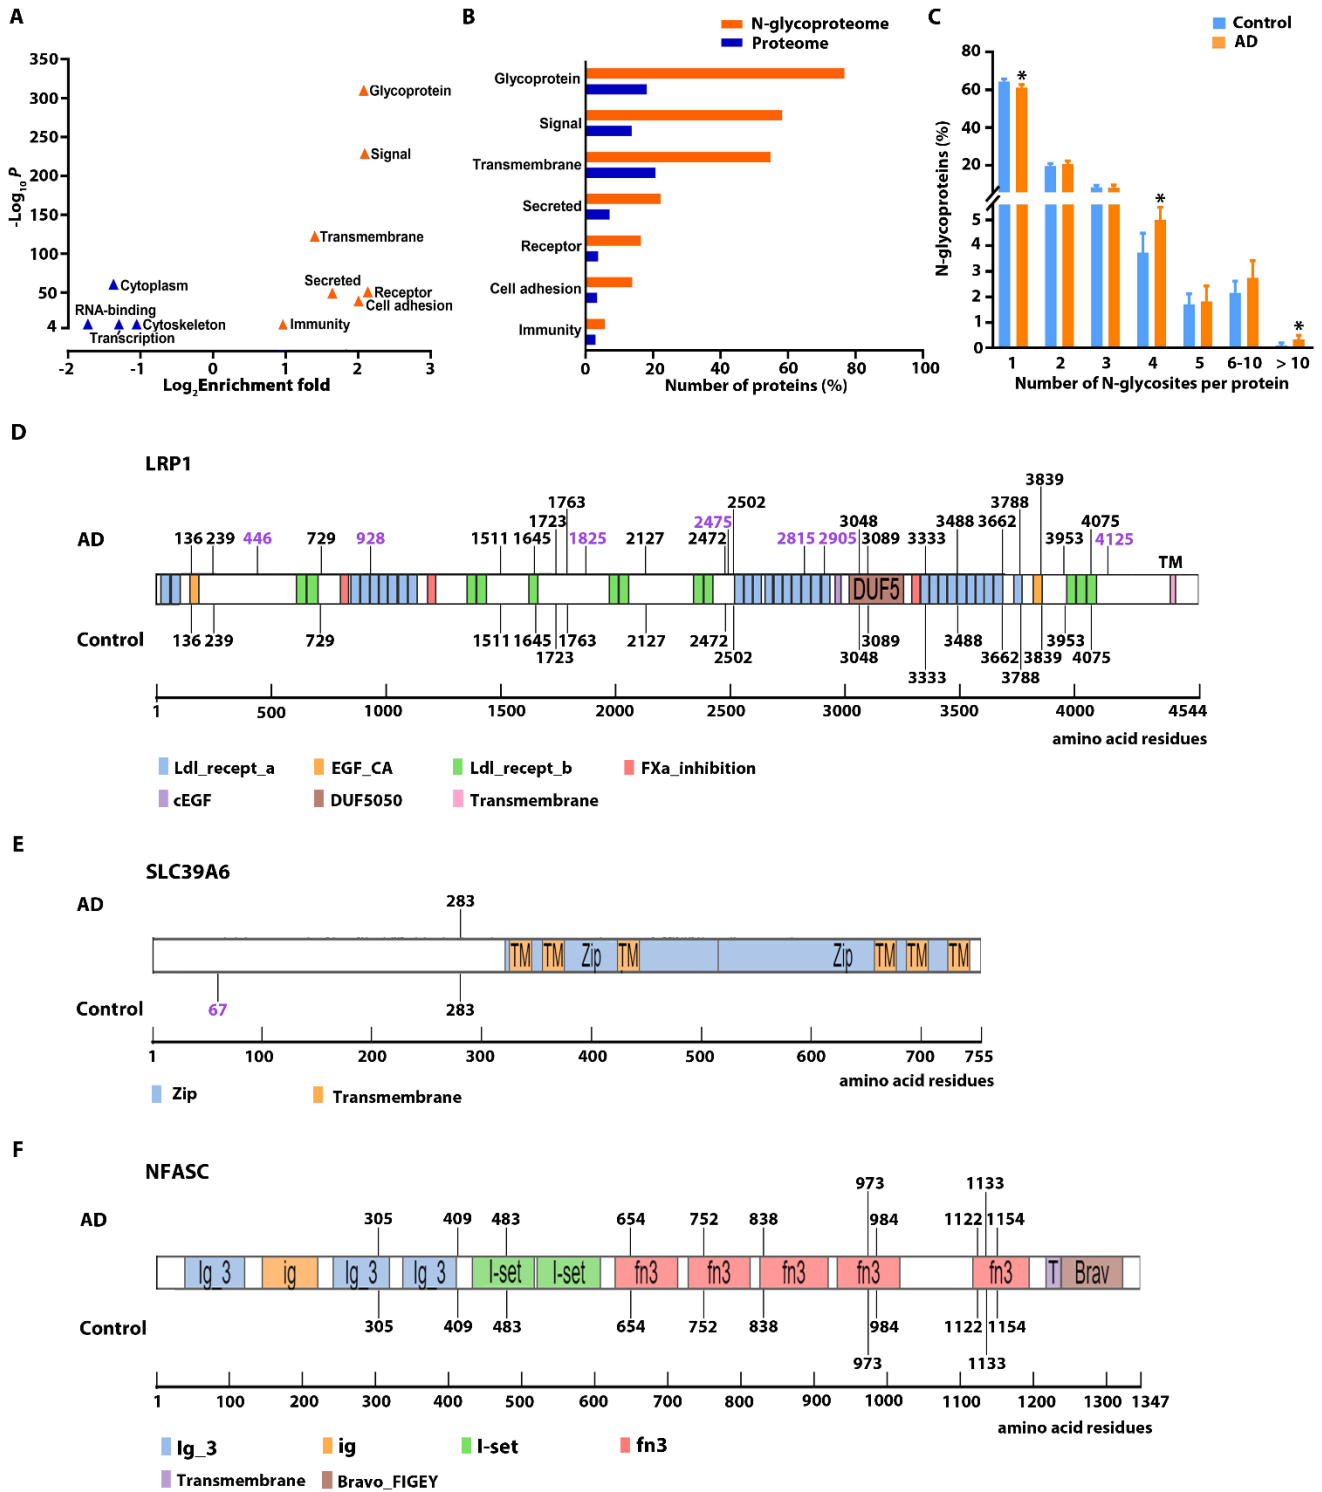

**Fig. S1. UniProt keyword enrichment analysis and examples of *in vivo* N-glycosylation site changes in AD. (A)** UniProt keywords enriched or underrepresented in the brain N-glycoproteome

compared to the brain proteome with Benjamini-Hochberg FDR-corrected  $P < 0.0001$ . **(B)** Percentages of proteins in the brain N-glycoproteome and proteome with each enriched UniProt keywords. **(C)** Distribution of the identified N-glycoproteins with the indicated number of *in vivo* N-glycosites per protein in AD and control brains is shown as mean  $\pm$  SD (n = 8 cases per AD or control group). \* $P < 0.01$  versus the control. **(D-F)** Examples of N-glycoproteins with increased (D), reduced (E), or unaltered (F) number of *in vivo* N-glycosylation sites in AD compared to control brains. The asparagine residue positions of the N-glycosites of LRP1, SLC39A6, NFASC identified in AD or controls are indicated by the numbers flanking the protein domain diagram, with the purple numbers denoting the N-glycosites gained (D) or lost (E) in AD. Domain diagram for each protein is derived from PhosphoSitePlus<sup>®</sup> ([www.phosphosite.org](http://www.phosphosite.org)) with the names of color-coded domains shown below the diagram.

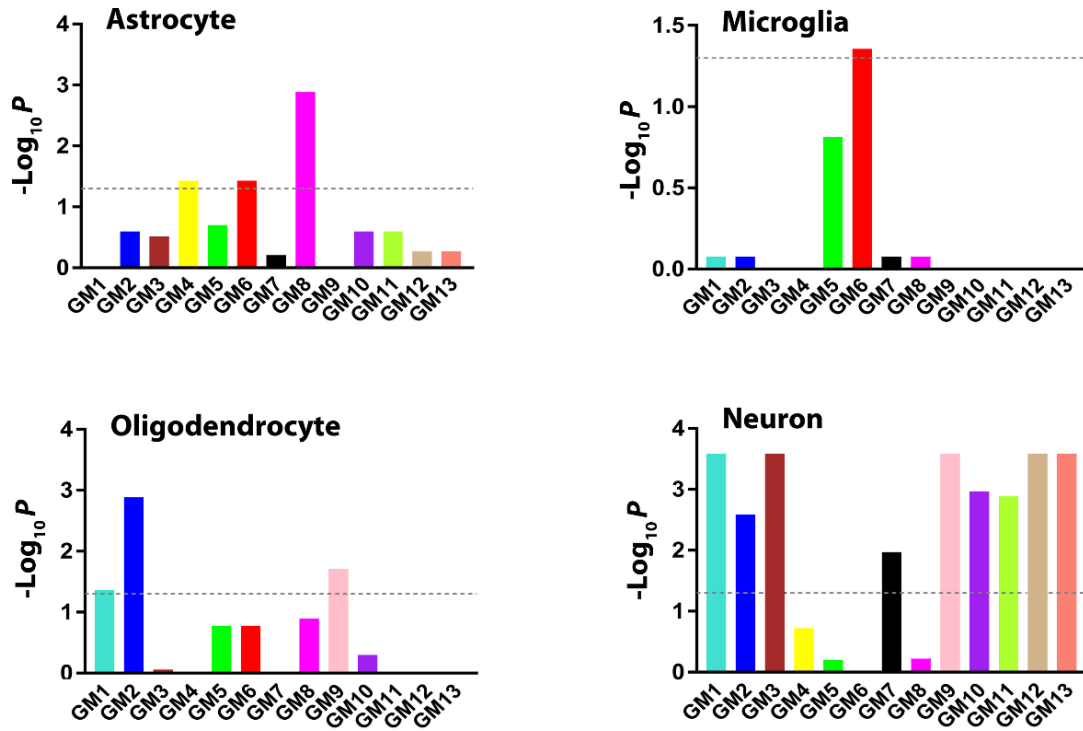

**Fig. S2. Enrichment analysis for cell-type markers in glyco-network modules.** Enrichment for markers of astrocyte, microglia, oligodendrocyte, or neuron in each module was assessed using one-sided Fisher's exact test  $P$  value followed by Benjamini-Hochberg FDR correction. Enrichment with FDR-corrected  $P < 0.05$  (above the dashed line) is considered significant.

**Module-trait relationships**

|      | Age                        | Sex             | AD status                     | Plaque                        | Braak                         | ApoE            | PMI             |
|------|----------------------------|-----------------|-------------------------------|-------------------------------|-------------------------------|-----------------|-----------------|
| GM8  | 0.27<br>(0.3)              | -0.43<br>(0.1)  | 0.53<br>(0.03)                | 0.55<br>(0.03)                | 0.46<br>(0.08)                | 0.67<br>(0.004) | -0.34<br>(0.2)  |
| GM6  | 0.15<br>(0.6)              | -0.22<br>(0.4)  | 0.88<br>(6x10 <sup>-6</sup> ) | 0.88<br>(8x10 <sup>-6</sup> ) | 0.87<br>(9x10 <sup>-6</sup> ) | 0.41<br>(0.1)   | -0.31<br>(0.2)  |
| GM4  | -0.092<br>(0.7)            | -0.3<br>(0.3)   | 0.71<br>(0.002)               | 0.62<br>(0.01)                | 0.68<br>(0.004)               | -0.11<br>(0.7)  | -0.28<br>(0.3)  |
| GM2  | -0.27<br>(0.3)             | -0.32<br>(0.2)  | -0.3<br>(0.3)                 | -0.29<br>(0.3)                | -0.38<br>(0.1)                | -0.069<br>(0.8) | -0.22<br>(0.4)  |
| GM5  | -0.14<br>(0.6)             | -0.14<br>(0.6)  | -0.36<br>(0.2)                | -0.35<br>(0.2)                | -0.41<br>(0.1)                | -0.033<br>(0.9) | -0.0016<br>(1)  |
| GM9  | -0.26<br>(0.3)             | -0.22<br>(0.4)  | -0.54<br>(0.03)               | -0.53<br>(0.03)               | -0.57<br>(0.02)               | -0.13<br>(0.6)  | -0.019<br>(0.9) |
| GM7  | -0.17<br>(0.5)             | -0.21<br>(0.4)  | 0.14<br>(0.6)                 | 0.15<br>(0.6)                 | 0.08<br>(0.8)                 | -0.29<br>(0.3)  | -0.23<br>(0.4)  |
| GM3  | -0.2<br>(0.5)              | -0.52<br>(0.04) | -0.15<br>(0.6)                | -0.13<br>(0.6)                | -0.22<br>(0.4)                | -0.066<br>(0.8) | -0.28<br>(0.3)  |
| GM1  | -0.025<br>(0.9)            | -0.13<br>(0.6)  | -0.61<br>(0.01)               | -0.58<br>(0.02)               | -0.62<br>(0.01)               | -0.36<br>(0.2)  | 0.088<br>(0.7)  |
| GM10 | -5x10 <sup>-4</sup><br>(1) | -0.29<br>(0.3)  | -0.064<br>(0.8)               | -0.086<br>(0.8)               | -0.097<br>(0.7)               | 0.051<br>(0.9)  | -0.14<br>(0.6)  |
| GM13 | 0.13<br>(0.6)              | -0.2<br>(0.5)   | -0.26<br>(0.3)                | -0.16<br>(0.6)                | -0.23<br>(0.4)                | -0.2<br>(0.5)   | -0.2<br>(0.5)   |
| GM11 | 0.081<br>(0.8)             | -0.21<br>(0.4)  | 0.27<br>(0.3)                 | 0.2<br>(0.5)                  | 0.3<br>(0.3)                  | -0.081<br>(0.8) | -0.2<br>(0.4)   |
| GM12 | 0.08<br>(0.8)              | -0.38<br>(0.1)  | 0.65<br>(0.006)               | 0.62<br>(0.01)                | 0.66<br>(0.005)               | 0.26<br>(0.3)   | -0.17<br>(0.5)  |

**Fig. S3. Module-trait relationships of glyco-network modules to clinical or neuro-pathological traits.** The relationship between each module to each trait was assessed by biweight midcorrelation between the module eigenglycopeptide and the indicated trait, with the correlation coefficient (bicor  $r$ -value) shown on the top and  $P$  value in the bracket below. Significant positive correlations ( $r > 0.50$ ,  $P < 0.05$ ) are highlighted in *Orange*, and significant negative correlations ( $r < -0.50$ ,  $P < 0.05$ ) in *Blue*. PMI, postmortem interval.
